# Supplementary material
Source: publisher site journal article supplement (https://www.spandidos-publications.com/6810/downloadSupplementary)
Supplement: Supplementary file 1 [file downloadSupplementary]

## Sheet: Sheet1
Table SXVII. Targets of differentially expressed piRNAs discovered in normal and chronic pancreatitis plasma samples.
Downregulated targets for upregulated piRNAs	Upregulated targets for downregulated piRNAs
MT-CO3	HES7
MTCO3P12	TRPM8
LTB4R2	RNA45SN5
MT-ND6	EYA4
MIR181A1HG	INTS4
KIAA0825	FP236383.1
MIR181A1	AAMDC
MIR181A2HG	AAMDC
MIR181B2	SCAMP5
MTND6P3	AL137230.2
MIR181A2	AC241377.2
ZNF3	FP236383.1
MIR181A2HG	API5
C20orf194	ANKRD63
	IFT88
	IQCA1
	PDE3A
	FP236383.1
	FP236383.1
	TM9SF2
	EFCAB11
	AL592295.3
	ATP5MC3
	FP671120.1
	SYNRG
	SLCO5A1
	SLCO5A1
	EED
	FP236383.1
	BX284668.2
	G3BP2
	RYR2
	FP671120.1
	WWP2
	CROCC
	MACF1
pi, piwi-interacting.
